# Supplementary material for: Functional analysis reveals that RBM10 mutations contribute to lung adenocarcinoma pathogenesis by deregulating splicing
Source: PubMed Central journal article supplement (PMC5238425; doi:10.1038/srep40488), 2017-01-16
Supplement: srep40488-s1.pdf [file srep40488-s1.pdf]

## Supplementary Information

### **Functional analysis reveals that RBM10 mutations contribute to lung adenocarcinoma pathogenesis by deregulating splicing**

Jiawei Zhao<sup>1,+</sup>, Yue Sun<sup>2,3,+</sup>, Yin Huang<sup>6</sup>, Fan Song<sup>1</sup>, Zengshu Huang<sup>5</sup>, Yufang Bao<sup>1</sup>, Ji Zuo<sup>1</sup>, David Saffen<sup>1,3,4</sup>, Zhen Shao<sup>6</sup>, Wen Liu<sup>1,\*</sup>, Yongbo Wang<sup>1,\*</sup>

<sup>1</sup> Department of Cellular and Genetic Medicine, School of Basic Medical Sciences, Fudan University, Shanghai, 200032, China

<sup>2</sup> School of Life Sciences, Fudan University, Shanghai, 200438, China

<sup>3</sup> Institutes of Brain Science, Fudan University, Shanghai, 200032, China

<sup>4</sup> State Key Laboratory for Medical Neurobiology, Fudan University, Shanghai, 200032, China

<sup>5</sup> Shanghai Medical College, Fudan University, Shanghai, 200032, China

<sup>6</sup> Key Laboratory of Computational Biology, CAS-MPG Partner Institute for Computational Biology, Shanghai Institutes for Biological Sciences, Chinese Academy of Sciences, Shanghai 200031, China

+ These authors contributed equally to this work.

\* Corresponding authors.

#### **Corresponding authors**

Correspondence to Yongbo Wang, E-mail: [wangyongbo@fudan.edu.cn](mailto:wangyongbo@fudan.edu.cn) or Wen Liu, E-mail: [liuwen@shmu.edu.cn](mailto:liuwen@shmu.edu.cn)

## Supplementary Figures

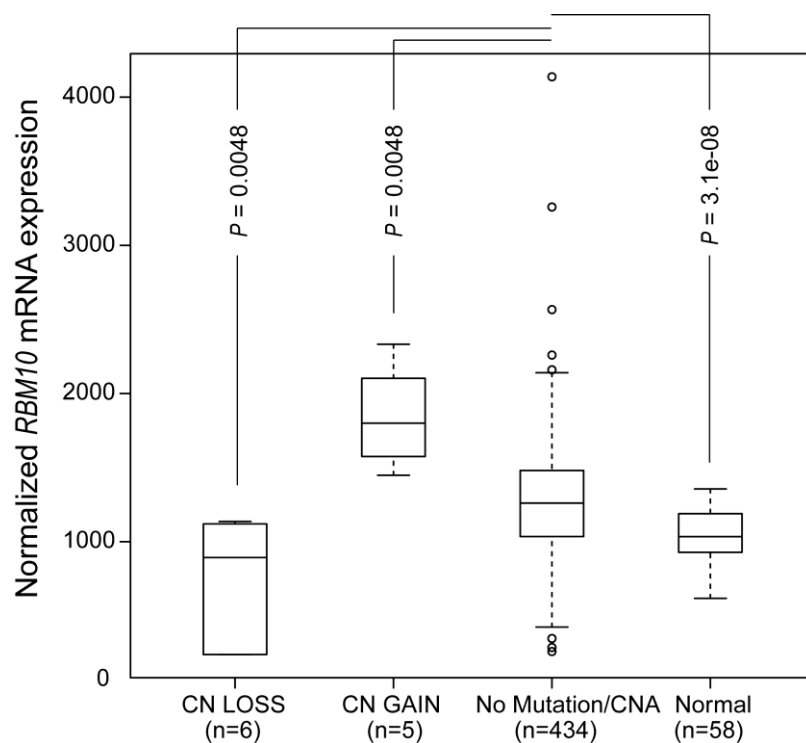

### Supplementary Figure S1. Effects of RBM10 copy number alterations

(CNAs) on its RNA expression. Box plot shows *RBM10* mRNA expression in

LUAD samples with RBM10 copy number loss (CN LOSS), copy number gain

(CN GAIN), without RBM10 mutation and CNA (No Mutation/CNA), and in

tumor-adjacent normal tissue (Normal). *P* values were calculated using

Mann-Whitney tests followed by Benjamini & Hochberg corrections. Data are

from TCGA and COSMIC (see Methods for details). Boxes represent the

medians (inside lines) and the quartiles (upper and bottom boarder lines).

“Whiskers” above and below the boxes represent maximum and minimum

values within the  $1.5 \times$  IQ (inter quarter) range.

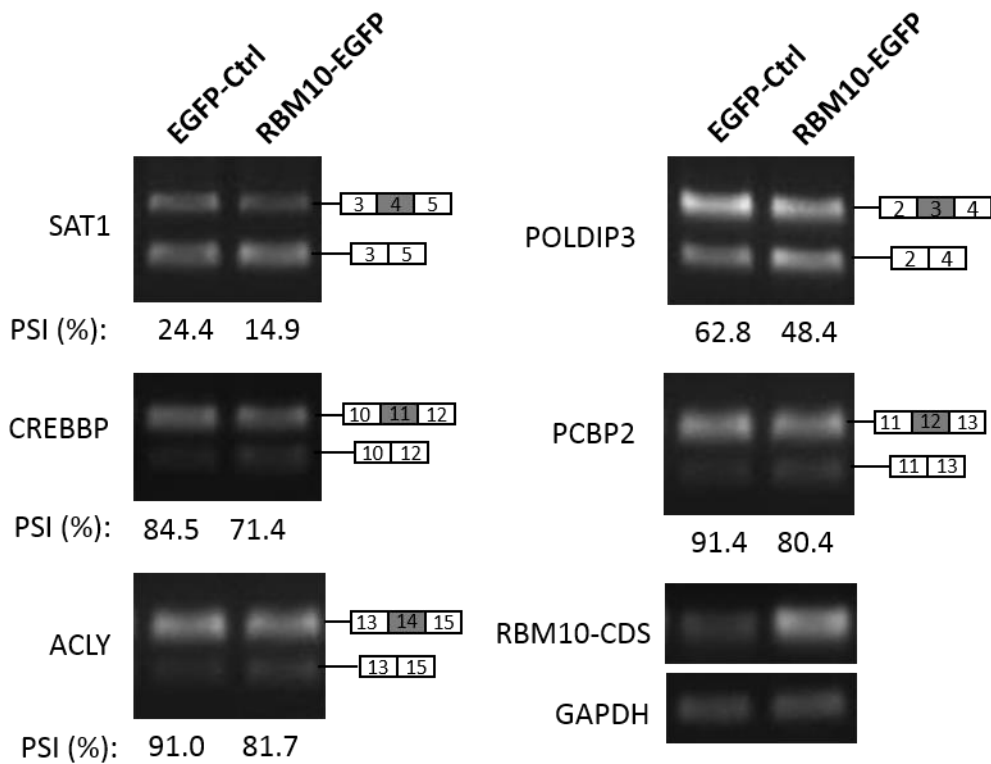

**Supplementary Figure S2. RBM10-EGFP overexpression (OE) promotes exon skipping in RBM10 target genes in HEK293 cells.** Differences in splicing in five RBM10 target genes transiently overexpressing EGFP or RBM10-EGFP were detected by RT-PCR. Shown are gel images of RT-PCR products, whose identities are indicated on the right, based on Refseq transcript variant 1 sequences of these genes. RT-PCR using primers binding to RBM10 coding sequences (RBM10-CDS) provided a measure of the extent of OE. *GAPDH* was used as an internal control. Exon inclusion levels, represented by PSI (percent-splice-in) values, were calculated from the PCR band intensities quantified using ImageJ software.

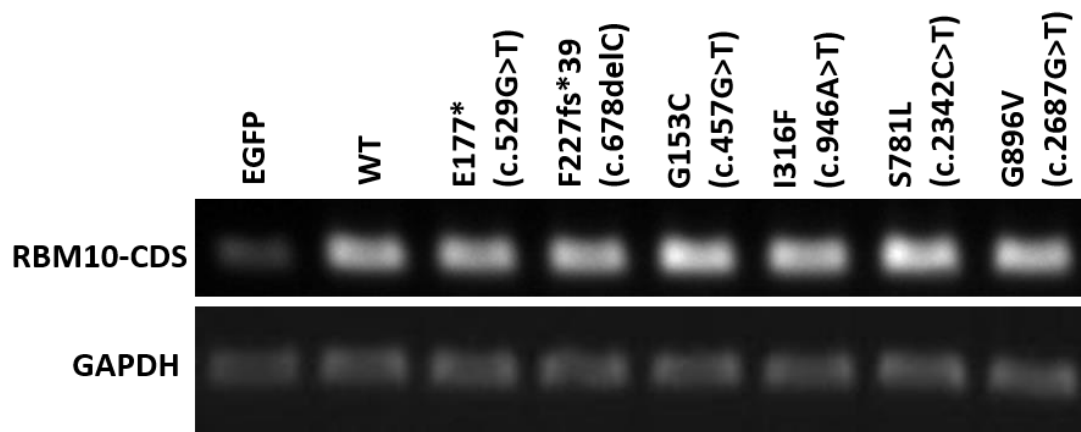

**Supplementary Figure S3. RT-PCR assessment of *RBM10* mRNA expression levels in *RBM10*-EGFP wild type (WT) or mutant (MUT) transfected HEK293 cells.** RT-PCR primer binding to *RBM10* coding sequence (*RBM10*-CDS) was used to measure the extent of OE. A representative gel image from three independent experiments is shown. *GAPDH*: internal control.

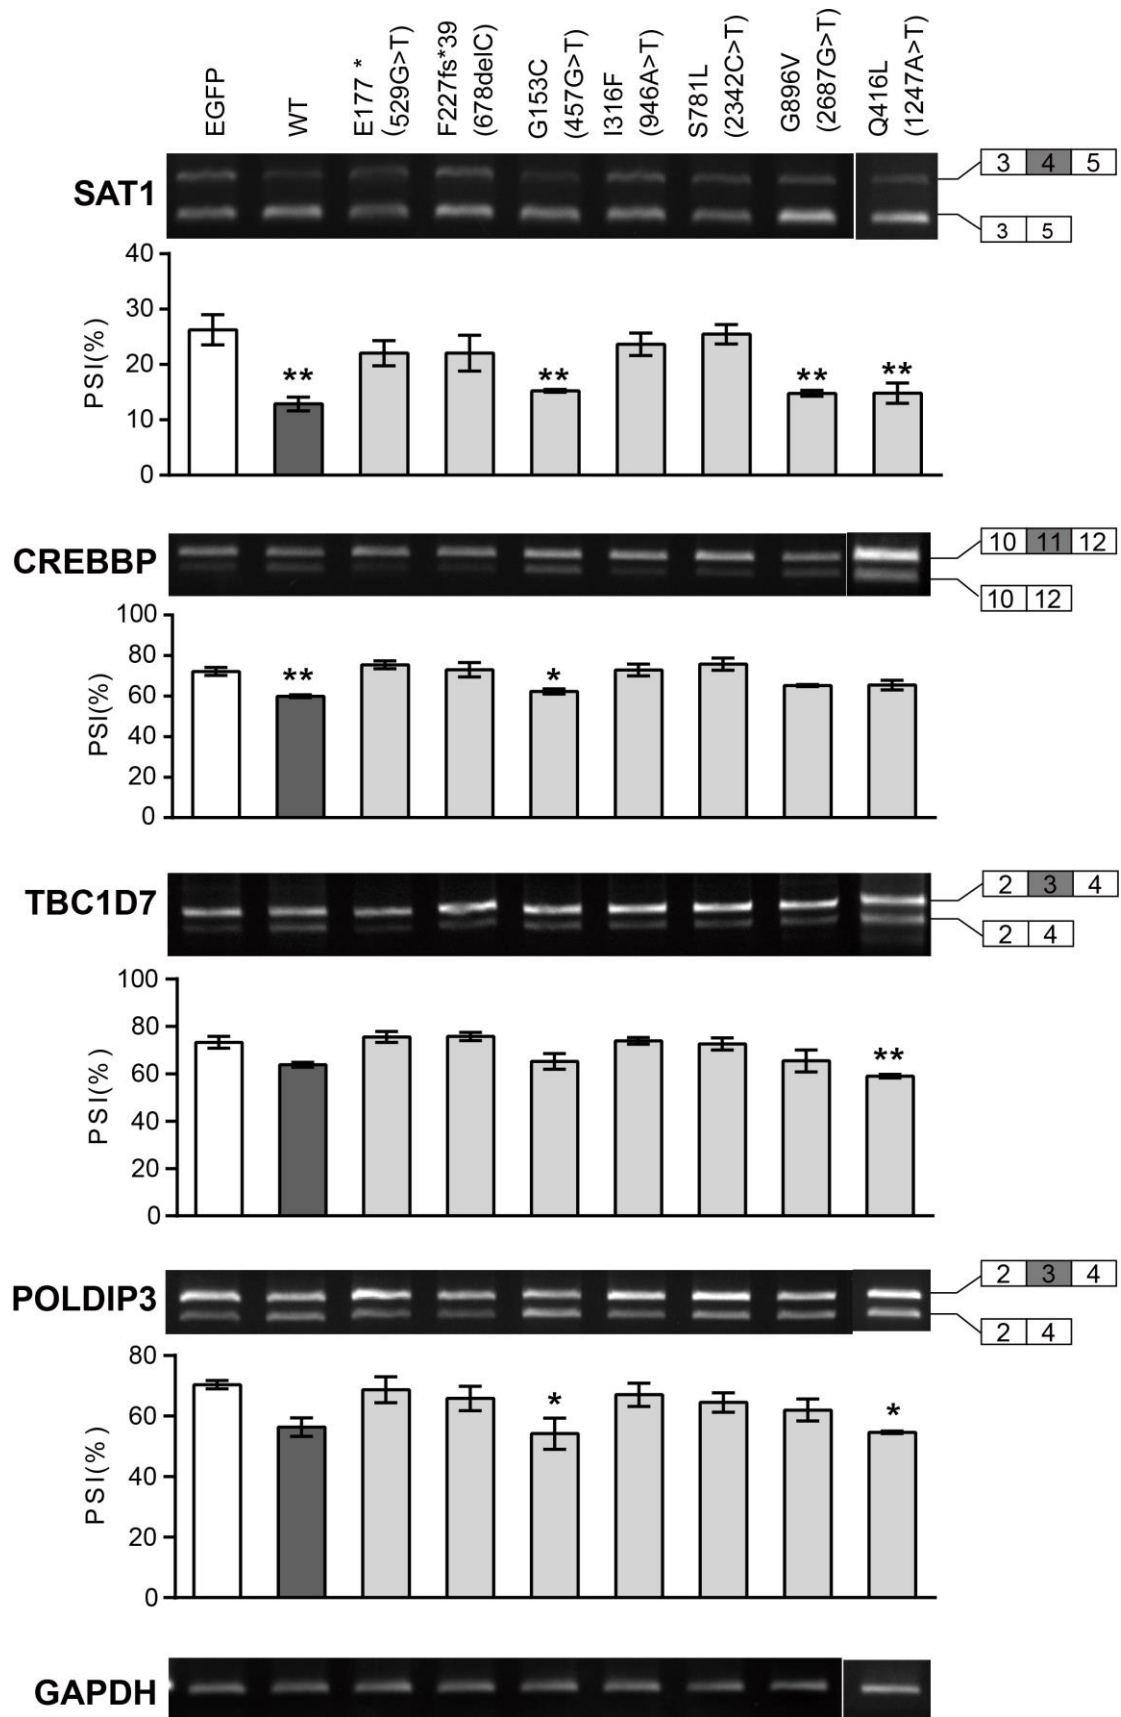

**Supplementary Figure S4. Splicing changes in four RBM10 target genes induced by RBM10-EGFP wild type (WT) and mutants (MUTs) overexpression in HEK293 cells.** Splice variants were examined by RT-PCR and quantified as PSI (percent-splice-in) values. Means  $\pm$  SEM of PSIs from three independent experiments are plotted below representative gel images. *GAPDH*: internal control. All samples were compared with EGFP controls. ns: not significant, \*  $P \leq 0.05$ , \*\*  $P \leq 0.01$  (One-way ANOVA followed by Dunnett's test for multiple comparisons to control). Note that RT-PCR products for Q416L were prepared in parallel with the other samples, but resolved in non-adjacent lanes in the gels.

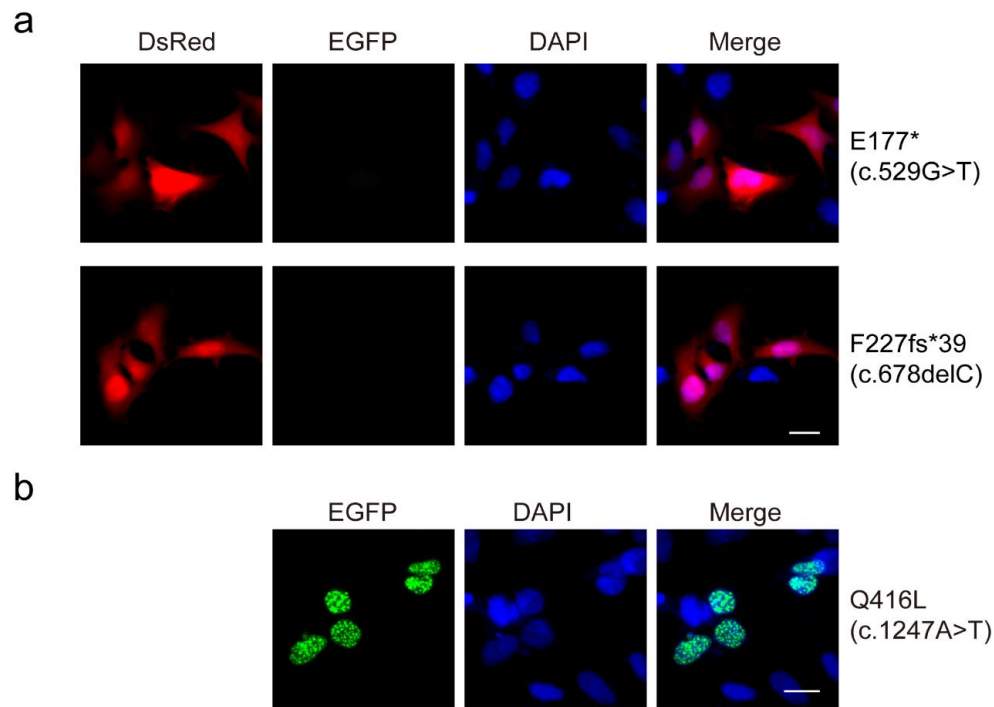

**Supplementary Figure S5. Subcellular localizations of RBM10-EGFP E177\*, F227fs\*39 and Q416L in HEK293 cells. (a)** RBM10-EGFP E177\* and RBM10-EGFP F227fs\*39 were cotransfected with DsRed expression plasmids. RBM10-EGFP fluorescence was absent in these cells, consistent with lack of expression of the fusion proteins. **(b)** RBM10-EGFP Q416L localized to the nucleus. Magnification: 40x. Scale bar: 10  $\mu$ m. Nuclei were visualized by DAPI staining.

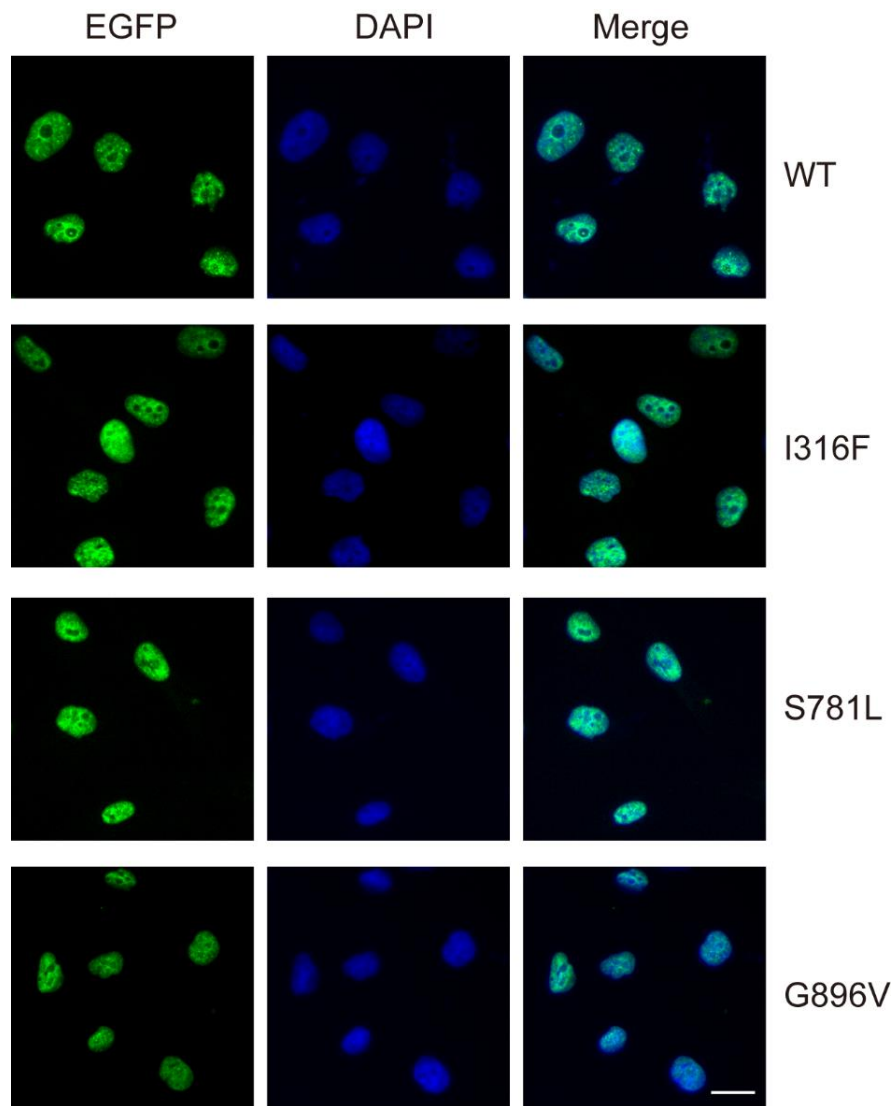

**Supplementary Figure S6. Nuclei subcellular localizations of RBM10-EGFP wild type (WT), I316F, S781L and G896V fusion proteins in tet-on A549 cells. Magnification: 40x. Scale bar: 10  $\mu$ m. Nuclei were visualized by DAPI staining.**



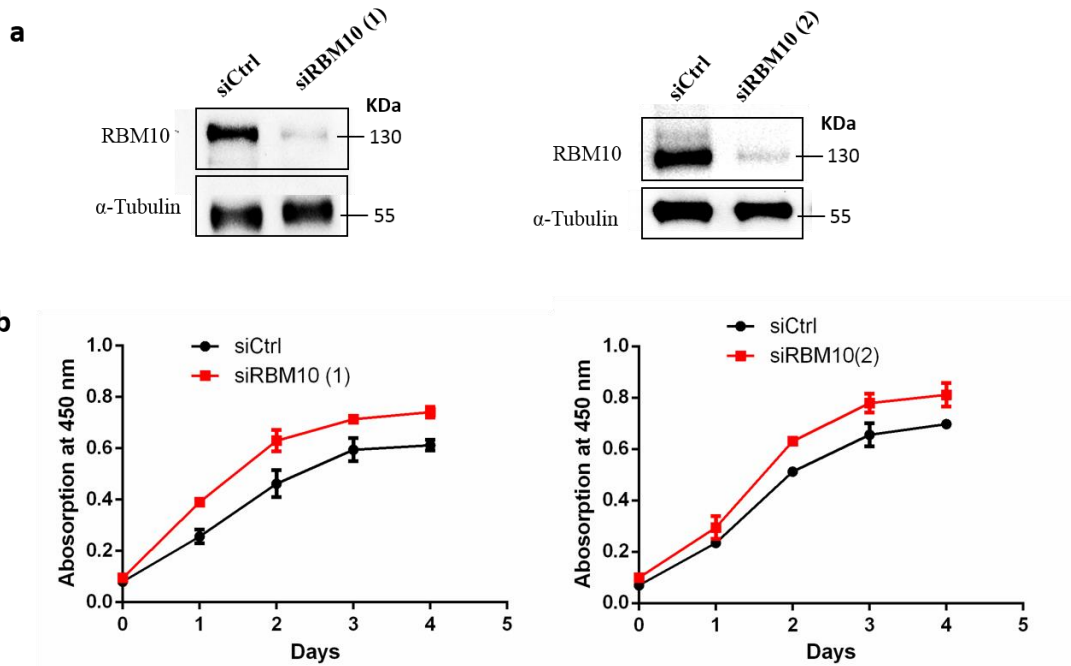

**Supplementary Figure S7. RBM10 depletion promotes proliferation of LUAD A549 cells.** **(a)** Western blots showing the degree of RBM10 depletion achieved by transfecting A549 cells with siRNAs against RBM10 [siRBM10(1) or siRBM10(2)] or non-target control siRNA (siCtrl). Sequences of siRBM10(1), siRBM10(2) and control siRNA are listed in Supplementary Table S2.  $\alpha$ -Tubulin served as the loading control. **(b)** CCK8 analysis of the proliferation rates of A549 cells transfected with siRBM10(1), siRBM10(2) or siCtrl. Error bars:  $\pm$  SD, n = 4 technical replicates.

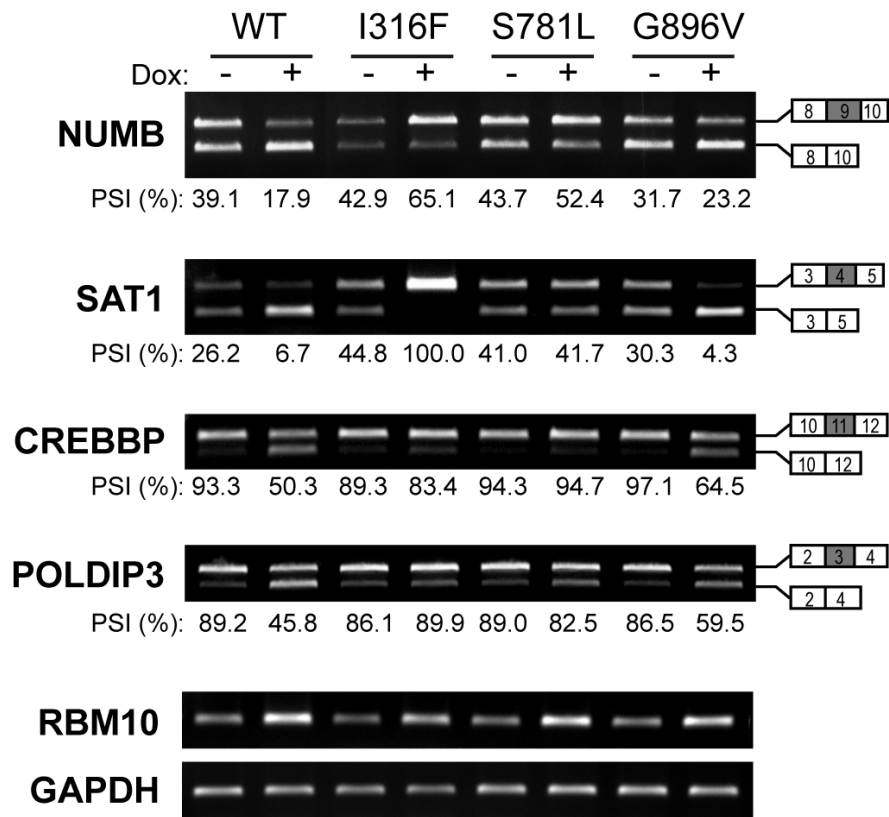

**Supplementary Figure S8. Splicing changes of four RBM10 target genes induced by overexpression (OE) of RBM10 wild type (WT) or one of three missense mutants (MUTs) in tet-on A549 cells.** OE was achieved by 1  $\mu\text{g/ml}$  doxycycline (Dox) treatment. Splice variants were examined by RT-PCR and quantified as PSI (percent-splice-in, %) values and shown below the gel image. Primer binding to RBM10 coding sequence (RBM10-CDS) measures the extent of OE. *GAPDH*: internal control.

a Related to Figure 3c

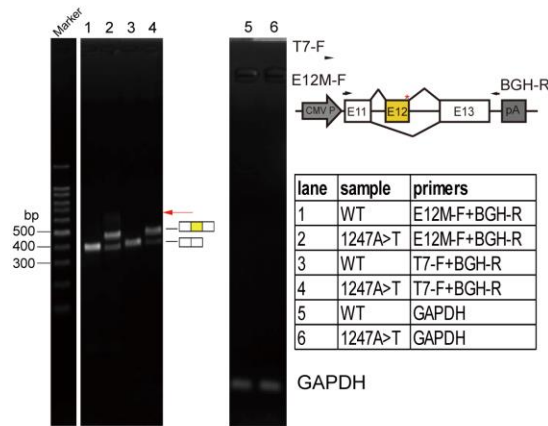

b Related to Figure 4b

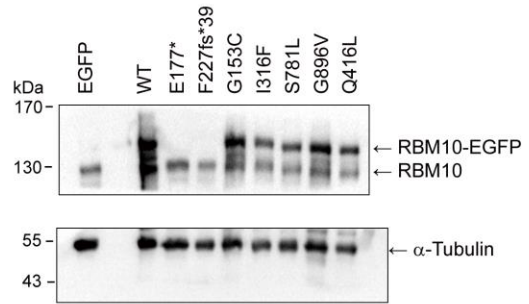

c Related to Figure 4e

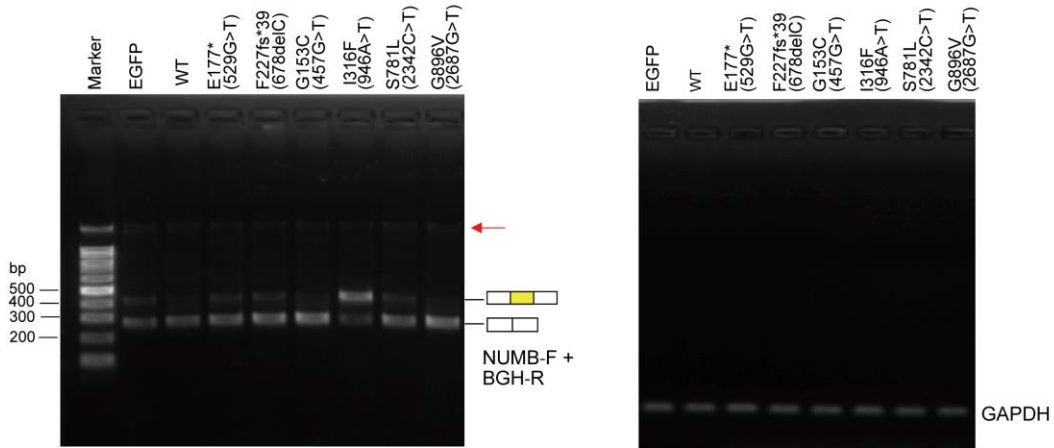

d Related to Figure 5

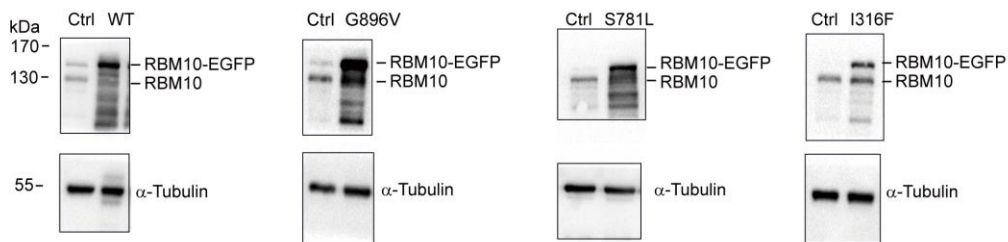

**Supplementary Figure S9. (a-d) Full-length images of agarose gels and western blots related to Figure 3c, 4b, 4e and 5, respectively.** PCR products by primer T7-F and BGH-R were included in (a) to support the specificity of those by primer E12M-F and BGH-R. The band marked by red arrow in (a) is likely representing *RBM10* intron 11 unspliced product, and that

in (c) is likely representing *NUMB* intron 9 unspliced product. The nonspecific bands detected in (d) are likely degraded products or artifacts of RBM10-EGFP overexpression. bp: base pair. Marker: 100 bp DNA ladder from NEB.

## Supplementary Tables

**Supplementary Table S1. RBM10 mutations and mRNA expression levels in COSMIC and TCGA LUAD samples.** Normalized *RBM10* mRNA expression levels were obtained from TCGA. FATHMM prediction results were obtained from COSMIC. Four reported oncogene-negative samples were highlighted in yellow. Table S1 is provided as a separate excel file.

**Supplementary Table S2. Sequences of oligonucleotides and PCR primers used in this study.**

| <b>Construct</b>   |                                                  |                        |
|--------------------|--------------------------------------------------|------------------------|
| <b>Primer Name</b> | <b>Primer Sequence (5'-3')</b>                   | <b>Vector</b>          |
| R10_ NheI_F        | ACGCGCTAGCATGGAGTATGAAAGACGTGGTG                 | RBM10-EGFP             |
| R10_ EcoRI_R       | ATTTGAATTCCTCTGGGCCTCGTTGAAGCG                   |                        |
| R10-NotI-F         | TAATGCGGCCGCGGTCTATATAAGCAGAGCTGGT               | pLVX-RBM10-GFP         |
| GFP-MluI-R         | GTCACGCGITGATTATGATCTAGAGTCGCGG                  |                        |
| RBM10-E12M-F       | GGGAGACCCAAGCTGGCTAGCGAGGCAGCCCAGC<br>TGCTGC     | RBM10-E12M<br>minigene |
| RBM10-E12M-R       | TAGTCCAGTGTTGGTGAATTCCTGCTCCAGTGGGAT<br>CCCCTTTG |                        |
| NUMB-1_fwd         | tttaaacgggccctctagacTGCCAGAAGTAGAAGGGG           | NUMB minigene          |
| NUMB-1_rev         | aatgtgtaagTGCTCAATAAATGGTGCC                     |                        |
| NUMB-2_fwd         | ttattgagcaCTTACACATTGCTTGCCAC                    |                        |
| NUMB-2_rev         | gagtcagtgCATTAGCTACAACGGGAG                      |                        |
| NUMB-3_fwd         | gtagctaagGCACTGACTCAGCCTTCC                      |                        |
| NUMB-3_rev         | tgatcagcggtttaaacttaACCTCTTCTAACCATCGGTC         |                        |
| <b>Mutagenesis</b> |                                                  |                        |
| <b>Primer Name</b> | <b>Sequence (5'-3')</b>                          |                        |
| E12M- A1247T-F     | CCATCTCACTGgtactcagACCCCTTGTGCCTCCCAGC           |                        |
| E12M- A1247T-R     | ctgagtacCAGTGAGATGGCCCACTGGGCCGCAGCAA            |                        |
| 457G-T (G153C)-F   | AGTCGCACtGCGTGCAAGCAC                            |                        |
| 457G-T (G153C)-R   | GCAGCTGGCCACGGATGTCATCC                          |                        |
| 529G-T (E177)-F    | CCTTCGTcIAGTTTAGTCACTT                           |                        |
| 529G-T (E177)-R    | CGAAGCCCCGGCTCTGA                                |                        |
| RBM10-C678del-F    | CGTCCAGAATTCAAACGCCGAGAGAAGTGCTTCAAATG           |                        |
| RBM10-C678del-R    | GCGTTTGAATTCTGGACGCCACACTTATTGCACAGC             |                        |

|                    |                                       |                            |
|--------------------|---------------------------------------|----------------------------|
| 946A-T (I316F)-F   | TGGATTCCiTCCTGGGGGCC                  |                            |
| 946A-T (I316F)-R   | TGGTGCTGTGTGGGTTTCAGGT                |                            |
| RBM10-A1247T-F     | CCATCTCACTGGCCTCCCAAGGTGGGGAGGGTACCTG |                            |
| RBM10-A1247T-R     | TGGGAGGCCAGTGAGATGGCCCACTGGGCCGCAGC   |                            |
| 2342C-T (S781L)-F  | CAGCTCTiAGGGCTCCAC                    |                            |
| 2342C-T (S781L)-R  | CTGGTGCCGGATGAGCG                     |                            |
| 2687G-T (G896V)-F  | TGCGGGiCTCCGGCCTGG                    |                            |
| 2687G-T (G896V)-R  | CCCGTGTTTGGGCCTCGATAGGCG              |                            |
| <b>RT-PCR</b>      |                                       |                            |
| <b>Primer Name</b> | <b>Sequence (5'-3')</b>               | <b>Product length (bp)</b> |
| ACLY_F             | CTGCAAAGAAGGCCAAGCC                   | 141, 171                   |
| ACLY_R             | CGTCTCGGGAGCAGACATAG                  |                            |
| CHTOP_F            | GCCCAGCAGATGGAGAATAG                  | 534, 212                   |
| CHTOP_R            | AGCATCCAGGTGTCCTTTTG                  |                            |
| CREBBP_F           | AGGCACAACCTGTGAGACCT                  | 142, 187                   |
| CREBBP_R           | ACTGAGCCCATGCTGTTTCAT                 |                            |
| NUMB_F             | GAAGTAGAAGGGGAGGCAGA                  | 225, 369                   |
| NUMB_R             | GTCGGCCTCAGAGGGAGTA                   |                            |
| PCBP2_F            | TTGACCAAGCTGCACCAG                    | 129, 168                   |
| PCBP2_R            | ATCGTTTGGAAATGGTGAGTTC                |                            |
| POLDIP3-F          | TCGAATCAAAGGGAAAGTGC                  | 273, 360                   |
| POLDIP3-R          | CCTGAGGCTGCAAACCTTCAT                 |                            |
| SAT1_F             | TTTGGAGAGCACCCCTTTTA                  | 202, 92                    |
| SAT1_R             | ATGGCAAAACCAACAATGCT                  |                            |
| TBC1D7_F           | TGAGAAAGTGGGGTTTCGTG                  | 337, 256                   |
| TBC1D7_R           | TGGAAAAGAGGGACTTCGAG                  |                            |
| RBM10-CDS-F        | GCCTCTACTATGACCCCAACTCCCA             | 82                         |
| RBM10-CDS-R        | GTCCGCCTCTCCCATCCCA                   |                            |
| GAPDH-F            | TGCACCACCAACTGCTTAGC                  | 87                         |
| GAPDH-R            | GGCATGGACTGTGGTCATGAG                 |                            |
| BGH-R              | TAGAAGGCACAGTCGAGG                    | /                          |
| <b>siRNAs</b>      |                                       |                            |
| <b>Oligo Name</b>  | <b>Sequence (5'-3')</b>               |                            |
| siCtrl             | r(UUCUCCGAACGUGUCACGU)dTdT            |                            |
| siRBM10-1          | r(CCGCUGUGCUAAAUCUGA)dTdT             |                            |
| siRBM10-2          | r(CUUCGCCUUCGUCGAGUUUAG)              |                            |
